# Supplementary material
Source: publisher site journal article supplement (https://www.dovepress.com/article/100445)
Supplement: Supplementary file 1 [file get_supplementary_file.php]

## **Supplementary material 1**

### **Randomization and blinding**

All eligible patients were randomized via the Interactive Response Technology to one of the treatment arms. The investigator or his/her delegate contacted the Interactive Response Technology after confirming that the patient fulfilled all inclusion/exclusion criteria. Randomization was stratified by smoking status (current smoker, ex-smoker). A randomization ratio of 1:1 was used and the balance was maintained at the country level (USA). Patients, investigator staff, persons performing the assessments, and data analysts remained blind to the identity of the treatment that a patient had been randomized to from the time of randomization until database lock.

## Supplementary material 2

### Inclusion and exclusion criteria

#### *Inclusion criteria*

- Male or female adults aged  $\geq 40$  years, who had signed an informed consent form before initiation of any study-related procedure.
- Patients with stable, symptomatic COPD with airflow obstruction of level 2 and 3 according to the current Global Initiative for Chronic Obstructive Lung Disease (GOLD) strategy (GOLD 2011).
- Current or ex-smokers with a smoking history of at least 10 pack-years (10 pack-years was defined as 20 cigarettes a day for 10 years, or 10 cigarettes a day for 20 years). An ex-smoker was defined as a patient who has not smoked for  $\geq 6$  months at screening.
- Patients with a postbronchodilator forced expiratory volume in 1 second ( $FEV_1$ )  $\geq 30\%$  and  $< 80\%$  of the predicted normal, and a postbronchodilator  $FEV_1/FVC < 0.70$  at run-in visit. Postbronchodilator referred to 45 minutes after inhalation of 84  $\mu\text{g}$  ipratropium bromide (or equivalent dose).

#### *Exclusion criteria*

- Patients with Type I or uncontrolled Type II diabetes.
- Patients with a history of long QT syndrome or whose corrected QT ( $QTc$ ) measured at run-in visit (Fridericia's method) was prolonged ( $> 450$  ms for men and women) and confirmed by a central assessor. These patients were not to be rescreened.
- Patients who had a clinically significant electrocardiogram abnormality at run-in or baseline visits. These patients were not be rescreened.
- Patients with a history of malignancy of any organ system (other than localized basal cell carcinoma of the skin), treated or untreated, within the past 5 years regardless of whether there is evidence of local recurrence or metastases.
- Pregnant or nursing (lactating) women, where pregnancy was defined as the state of a woman after conception and until the termination of gestation, confirmed by a positive  $\beta$ -hCG laboratory test.

- Women of child-bearing potential, defined as all women physiologically capable of becoming pregnant, unless they were using effective methods of contraception during dosing of study treatment. Women were considered postmenopausal and not of child-bearing potential if they had 12 months of natural (spontaneous) amenorrhea with an appropriate clinical profile (eg, age appropriate, history of vasomotor symptoms) or had surgical bilateral oophorectomy (with or without hysterectomy) or tubal ligation at least 6 weeks ago. In the case of oophorectomy alone, only when the reproductive status of the woman was confirmed by follow-up hormone level assessment was she considered not of child-bearing potential.
- Patients who, in the judgment of the investigator, would be at potential risk if enrolled into the study.
- Patients who had a clinically significant laboratory abnormality at run-in visit.
- Patients with a body mass index of more than 40 kg/m<sup>2</sup>.
- Patients with clinically significant renal, cardiovascular (such as, but not limited to, unstable ischemic heart disease, New York Health Authority Class III/IV left ventricular failure, myocardial infarction), arrhythmia, neurological, endocrine, immunological, psychiatric, gastrointestinal, hepatic, or hematological abnormalities which could interfere with the assessment of the efficacy and safety of the study treatment.
- Patients with paroxysmal (eg, intermittent) atrial fibrillation. Patients with persistent atrial fibrillation defined by continuous atrial fibrillation for at least 6 months and controlled with a rate control strategy (ie, beta blocker, calcium channel blocker, pacemaker placement, digoxin, or ablation therapy) for at least 6 months could be considered for inclusion. In such patients, atrial fibrillation had to be present at run-in and baseline visits, with a resting ventricular rate of < 100/min.
- Patients contraindicated for treatment with, or having a history of reactions/hypersensitivity to any of the following inhaled drugs, drugs of a similar class or any component thereof: anticholinergics, long-/short-acting  $\beta_2$ -agonists, sympathomimetic amines, lactose, or any of the other excipients.

- Patients with narrow-angle glaucoma, symptomatic benign prostatic hyperplasia or bladder-neck obstruction, severe renal impairment, or urinary retention (Patients with benign prostatic hyperplasia who were stable on treatment could be considered).
- Patients who had not achieved acceptable spirometry results at screening (run-in visit) in accordance with American Thoracic Society and European Respiratory Society Task Force: Standardization of Lung Function Testing (ATS/ERS) criteria for acceptability and repeatability and spirometry guidance.
- Patients who had a COPD exacerbation that required treatment with antibiotics, systemic steroids, and/or hospitalization in the 6 weeks before prescreening. Patients could be re-screened after a minimum of 6 weeks after the resolution of the COPD exacerbation.
- Patients who had a COPD exacerbation between the prescreening and randomization visits were not eligible but were permitted to be re-screened after a minimum of 6 weeks after the resolution of the COPD exacerbation.
- Patients who had a respiratory tract infection within 4 weeks prior to prescreening. Patients who developed a respiratory tract infection between screening period and treatment were not eligible, but were permitted to be rescreened 4 weeks after the resolution of the respiratory tract infection.
- Patients requiring long-term oxygen therapy prescribed for > 12 hours per day.
- Patients with any history of asthma.
- Patients with a blood eosinophil count of > 600/mm<sup>3</sup> (during run-in visit).
- Patients with an onset of respiratory symptoms, including a COPD diagnosis prior to age 40 years.
- Patients with allergic rhinitis who were using an H<sub>1</sub>-antagonist or intranasal corticosteroids intermittently (treatment with a stable dose or regimen was permitted).
- Patients with concomitant pulmonary disease (eg, lung fibrosis, sarcoidosis, interstitial lung disease, pulmonary hypertension).
- Patients with clinically significant bronchiectasis.
- Patients with a diagnosis of  $\alpha$ -1 anti-trypsin deficiency.

- Patients with active pulmonary tuberculosis, unless confirmed by imaging to be no longer active.
- Patients with pulmonary lobectomy or lung volume reduction surgery or lung transplantation.
- Patients participating in or planning to participate in the active phase of a supervised pulmonary rehabilitation program during the study. Participation in a maintenance program was permitted.
- Patients receiving any medications in the classes listed in trial protocol.
- Use of other investigational drugs/devices (approved or unapproved) at the time of enrollment, or within 30 days or 5 half-lives of Visit 1, whichever was longer, or previous participation in the GEM2 replicate study.
- Patients unable to use an e-diary.
- Patients unable to use a dry powder inhaler device or a pressurized metered-dose inhaler (rescue medication) or comply with the study regimen. Spacer devices were not permitted.
- Investigational site staff, their immediate family, or sponsor staff connected with this study, were to be excluded from participation in this trial.

### **Supplementary material 3**

#### **Sample size calculation**

A difference of 100 mL between glycopyrrolate and placebo in terms of FEV<sub>1</sub> AUC<sub>0-12</sub> at Week 12 was assumed for the sample size calculation. A standard deviation of 200 mL was assumed based on data from other Novartis-sponsored COPD clinical studies; 86 completers per arm gave 90% power with a type I error of 0.05. In addition, 191 completers per arm gave 85% power to detect a treatment difference of 4 units between glycopyrrolate and placebo for the SGRQ total score at the level of 0.05, assuming a SD of 13 units. A drop-out of 10% was assumed therefore it was planned to randomize approximately 426 patients (or 213 randomized patients per arm) into the study.

**Table S1:** Treatment Differences Between Glycopyrrolate and Placebo for Other Efficacy Endpoints (FAS)

| Parameters                                | LSM Treatment differences (95% CI) |                         |
|-------------------------------------------|------------------------------------|-------------------------|
|                                           | Day 1                              | Week 12                 |
| Predose trough FEV <sub>1</sub> , L       | -                                  | 0.120 (0.078, 0.161)*** |
| Peak FEV <sub>1</sub> , L                 | 0.142 (0.112, 0.172)***            | 0.163 (0.117, 0.209)*** |
| Peak FVC, L                               | 0.250 (0.197, 0.303)***            | 0.189 (0.107, 0.272)*** |
| FEV <sub>1</sub> AUC <sub>0-4h</sub> , L  | 0.153 (0.127, 0.179)***            | 0.170 (0.125, 0.215)*** |
| FEV <sub>1</sub> AUC <sub>4-8h</sub> , L  | 0.136 (0.105, 0.168)***            | 0.132 (0.086, 0.179)*** |
| FEV <sub>1</sub> AUC <sub>8-12h</sub> , L | 0.139 (0.108, 0.171)***            | 0.108 (0.063, 0.153)*** |
| SGRQ total score, unit                    |                                    | -2.8 (-5.0, -0.5)*      |
| TDI focal score, point                    |                                    | 0.92 (0.32, 1.53)**     |
| CAT score                                 |                                    | -1.2 (-2.3,-0.1)*       |

\*\*\* $P < .001$ , \*\* $P < .01$ , \* $P < .05$ .

AUC = area under the curve; CAT = COPD Assessment Test; CI = confidence interval; FEV<sub>1</sub> = forced expiratory volume in 1 second; FAS = full analysis set; FVC = forced vital capacity; LSM = least squares mean; TDI = Transition Dyspnea Index; SGRQ = St. George's Respiratory Questionnaire.

**Table S2:** Improvement in Symptom Scores/Endpoints and Reduction in Rescue Medication Use Compared to Baseline With Glycopyrrolate Versus Placebo Over the 12-Week Treatment Period (FAS)

| Parameter                                                 | LSM treatment differences (95% CI) |
|-----------------------------------------------------------|------------------------------------|
| <b>Symptom scores/endpoints</b>                           |                                    |
| Daily total symptom score                                 | -0.37 (-0.68, -0.07)*              |
| Daytime total symptom score                               | -0.41 (-0.71, -0.12)**             |
| Nighttime total symptom score                             | -0.26 (-0.57, 0.05)                |
| Percentage of nights with no nighttime awakenings         | 2.1 (-3.0, 7.2)                    |
| Percentage of days with no daytime symptoms               | 2.6 (-0.4, 5.7)                    |
| Percentage of days able to perform usual daily activities | 6.7 (1.7, 11.8)**                  |
| <b>Rescue medication use</b>                              |                                    |
| Daily number of puffs of rescue medication                | -0.76 (-1.20, 0.33)***             |
| Daytime number of puffs of rescue medication              | -0.45 (-0.68, 0.22)***             |
| Nighttime number of puffs of rescue medication            | -0.35 (-0.56, -0.13)**             |
| Percentage of days with no rescue medication use          | 6.1 (0.7, 11.5)*                   |

\*\*\* $P < .001$ ; \*\* $P < .01$ ; \* $P < .05$ . CI = confidence interval; FAS = full analysis set; LSM = least squares mean.
